# Supplementary material for: Quantitative Identification of Mutant Alleles Derived from Lung Cancer in Plasma Cell-Free DNA via Anomaly Detection Using Deep Sequencing Data
Source: PLoS One. 2013 Nov 21;8(11):e81468. doi: 10.1371/journal.pone.0081468 (PMC3836767; doi:10.1371/journal.pone.0081468)
Supplement: Table S1 — Relationship between the error rate, read depth, and detection limit, assuming that the read error follows a Poisson distribution. (XLS) [file pone.0081468.s002.xls]

## Sheet: ReadMe
Table S1.
Relationship between the error rate, read depth, and detection limit, assuming that the read error follows a Poisson distribution.
“Number of base changes” indicates the minimum number of base changes fulfilling the criterion of upper cumulative probability (p<0.01 or p<2x10-5).
The detection limit was calculated as follows:
detection limit (%) = 100x((number of base changes)-(number of read errors)) / (number of reads).

## Sheet: Table
RER	l (number of read errors)	number of reads	threshold (P<0.01)	detection limit (%)(P<0.01)	threshold (P<2x10-5)	detection limit (%)(P<2x10-5)
0.01	10	1000	18	0.8	25	1.5
	100	10000	124	0.24	144	0.44
	500	50000	553	0.106	594	0.188
	1000	100000	1075	0.075	1133	0.133
	5000	500000	5165	0.033	5293	0.0586
0.002	2	1000	6	0.4	10	0.8
	20	10000	31	0.11	41	0.21
	100	50000	124	0.048	144	0.088
	200	100000	234	0.034	261	0.061
	1000	500000	1074	0.0148	1133	0.0266
0.0005	5	10000	11	0.06	16	0.11
	25	50000	37	0.024	48	0.046
	50	100000	67	0.017	82	0.032
	250	500000	288	0.0076	320	0.014
0.0001	1	10000	4	0.03	7	0.06
	5	50000	11	0.012	16	0.022
	10	100000	18	0.008	25	0.015
	50	500000	67	0.0034	82	0.0064
5e-05	1	10000	4	0.03	7	0.06
	3	50000	8	0.01	12	0.018
	5	100000	11	0.006	16	0.011
	25	500000	37	0.0024	48	0.0046
