# Supplementary material for: Quantitative Identification of Mutant Alleles Derived from Lung Cancer in Plasma Cell-Free DNA via Anomaly Detection Using Deep Sequencing Data
Source: PLoS One. 2013 Nov 21;8(11):e81468. doi: 10.1371/journal.pone.0081468 (PMC3836767; doi:10.1371/journal.pone.0081468)
Supplement: Table S4 — Base changes detected in the target loci in 155 retrospective samples. (XLS) [file pone.0081468.s005.xls]

## Sheet: ReadMe
Table S4.
Base changes detected in the target loci in 155 retrospective samples. The figures in columns F - J indicate the base changes in 100,000 reads.
Patients with two or more samples are designated with frames.

## Sheet: Table
	sample ID	patient ID	Tag	ex19del	L858R	T790M	L861Q	T2573A	T2573C	source of samples	EGFR mutation type	EGFR-TKI resistance	status	Best response to 1st EGFR-TKI	Sex	Age	Stage(UICC ver7)	Histology type
1	277	2	ACTAC	867301	0	23502	1	2	2	plasma	exon_19_del	Y	gefitinib	PR	m	24	4	adeno ca
2	82	13	ACTAC	1	0	8	0	1	6	plasma	no_mutation	Y	erlotinib PD for meningitis	PD	m	39	4	adeno ca
2	84	13	AGCAT	5	0	14	0	0	3	plasma	no_mutation	Y	erlotinib PD for meningitis	PD	m	39	4	adeno ca
3	53	25	ACTAC	11595	8	5942	0	3	8	CSF	exon_19_del	Y	erlotinib PD for meningitis before erlotinib+gemcitabine	PR	f	45	4	adeno ca
3	54	25	AGCAT	126	0	96	0	1	0	plasma	exon_19_del	Y	erlotinib PD for meningitis before erlotinib+gemcitabine	PR	f	45	4	adeno ca
3	85	25	ATAGC	25622	0	4918	3	1	5	CSF	exon_19_del	Y	erlotinib+gemcitabine PD for meningitis	PR	f	46	4	adeno ca
3	86	25	ACTAC	2	0	10	1	2	1	plasma	exon_19_del	Y	erlotinib+gemcitabine PD for meningitis	PR	f	46	4	adeno ca
3	87	25	AGCAT	0	0	8	2	1	9	urine	exon_19_del	Y	erlotinib+gemcitabine PD for meningitis	PR	f	46	4	adeno ca
4	228	27	AGCAT	0	0	43	2	2	0	plasma	exon_19_del	N	gefitinib treatment during PR	PD	m	76	4	adeno ca
4	267	27	ACGTA	139	0	5	0	0	3	plasma	exon_19_del	Y	gefitinib PD	PD	m	76	4	adeno ca
5	100	31	CTATG	0	0	23	2	3	4	plasma	exon_19_del	N	gefitinib before treatment	SD	m	63	4	adeno ca
5	185	31	ATGCT	1	0	3	2	5	3	plasma	exon_19_del	Y	gefitinib PD	SD	m	64	4	adeno ca
6	50	32	ATAGC	17182	0	0	2	4	16	pleural effusion	exon_19_del	Y	gefitinib PD	PD	m	79	4	adeno ca
7	69	36	ATAGC	1917	0	418	1	6	32	plasma	exon_19_del	Y	erlotinib PD	PR	f	73	4	adeno ca
8	77	40	CGATA	0	0	15	3	5	3	plasma	exon_19_del	N	gefitinib PR	PR	m	48	4	adeno ca
8	104	40	ACTAC	1405	0	13	4	4	6	plasma	exon_19_del	N	gefitinib+erlotinib PD	PR	m	48	4	adeno ca
9	258	44	TGACT	655	0	20	0	0	10	plasma	exon_19_del	N	gefitinib PR, but CEA increase	PR	f	55	4	adeno ca
9	286	44	TATGC	0	0	25	4	5	20	plasma	exon_19_del	N	gefitinib PR, but CEA increase	PR	f	55	4	adeno ca
9	309	44	ATAGC	1049	0	4	1	2	126	plasma	exon_19_del	N	gefitinib PR, but CEA increase	PR	f	55	4	adeno ca
9	316	44	CATAG	293	0	48	1	5	3	plasma	exon_19_del	Y	gefitinib PD	PR	f	55	4	adeno ca
10	45	45	ACTAC	22693	0	7	4	0	7	plasma	exon_19_del	Y	erlotinib PD	PR	m	71	4	adeno ca
11	55	55	CGATA	81690	0	8	1	3	4	plasma	exon_19_del	Y	erlotinib before rechallenge	PR	f	37	4	adeno ca
11	59	55	ATAGC	858	0	3	0	1	17	plasma	exon_19_del	Y	erlotinib PD	PR	f	37	4	adeno ca
12	56	56	CTATG	0	0	8	0	0	2	plasma	exon_19_del	Y	erlotinib PD	PD	m	60	4	adeno ca
12	65	56	TATGC	187	0	6	1	1	1	plasma	exon_19_del	Y	erlotinib PD	PD	m	60	4	adeno ca
13	57	57	ACTAC	90197	0	16988	1	1	4	plasma	exon_19_del	Y	erlotinib PD	PR	f	60	4	adeno ca
14	60	60	ACAGT	89	0	6	1	2	6	plasma	exon_19_del	N	gefitinib before treatment	NE	m	36	4	adeno ca
14	262	60	CTATG	0	0	32	3	3	4	plasma	exon_19_del	Y	gefitinib PD	NE	m	37	4	adeno ca
15	62	62	ACGTA	0	0	18	1	4	6	plasma	exon_19_del	N	gefitinib CR	CR	f	49	4	adeno ca
16	64	64	CACGT	0	0	7	0	2	2	plasma	exon_19_del	Y	erlotinib+Pemetrexed PD	PR	m	67	4	adeno ca
17	67	67	TGACT	0	0	5	0	1	3	plasma	exon_19_del	NE	gefitinib,erlotinib stop by AE	NE	f	55	4	adeno ca
18	74	74	CATAG	133	299	11	2	2	3	plasma	exon_19_del+L858R	Y	erlotinib PD	PR	f	67	4	adeno ca
19	90	78	ACTAC	339	99	6	3	1	2	plasma	exon_19_del	Y	erlotinib SD for meningitis	SD	f	55	4	adeno ca
20	116	100	AGCAT	0	0	17	1	5	13	plasma	exon_19_del	Y	gefitinib PD	PD	m	64	4	adeno ca
21	113	113	ACTAC	6	0	23	3	6	7	plasma	exon_19_del	Y	erlotinib PD	SD	m	63	4	adeno ca
22	115	115	AGCAT	0	0	28	5	7	9	plasma	exon_19_del	N	gefitinib PR	PR	f	63	4	adeno ca
23	118	118	ATAGC	0	0	11	3	5	6	plasma	exon_19_del	Y	erlotinib PD	SD	f	86	4	adeno ca
24	127	127	ACAGT	0	0	7	2	2	11	plasma	exon_19_del	Y	gefitinib PD	PR	m	54	4	adeno ca
24	146	127	ACGTA	151	0	2	0	2	2	plasma	exon_19_del	Y	gefitinib stop 2weeks	PR	m	54	4	adeno ca
25	132	132	ATAGC	521	0	860	0	1	8	plasma	exon_19_del	Y	erlotinib PD	PR	f	77	4	adeno ca
26	242	133	TGACT	751	0	12	0	2	3	plasma	exon_19_del	Y	gefitinib PD	PD	f	61	4	adeno ca
27	140	140	ACAGT	3899	0	8	0	5	4	plasma	exon_19_del	Y	erlotinib PD	PR	m	65	4	adeno ca
28	236	144	CACGT	4	0	6	3	2	3	plasma	exon_19_del	N	erlotinib+Bevacizumab	SD	f	77	4	adeno ca
28	270	144	TATGC	0	0	4	1	1	8	plasma	exon_19_del	N	erlotinib+Bevacizumab	SD	f	77	4	adeno ca
28	293	144	CTATG	136	0	1385	2	2	3	plasma	exon_19_del	N	erlotinib+Bevacizumab	SD	f	77	4	adeno ca
28	301	144	ATGCT	0	0	9	0	0	3	plasma	exon_19_del	N	erlotinib+Bevacizumab	SD	f	78	4	adeno ca
28	305	144	CATAG	0	2	17	1	0	2	plasma	exon_19_del	N	erlotinib+Bevacizumab	SD	f	78	4	adeno ca
28	315	144	TGACT	356	143	52	2	5	10	plasma	exon_19_del	N	erlotinib+Bevacizumab	SD	f	78	4	adeno ca
29	149	149	CACGT	5817	0	12	3	6	1	plasma	exon_19_del	N	before therapy	NE	f	56	3A	adeno ca
30	234	213	AGCAT	168	0	2	0	2	1	plasma	exon_19_del	N	gefitinib before treatment	PR	m	66	4	adeno ca
30	238	213	TGACT	0	0	11	0	1	3	plasma	exon_19_del	N	gefitinib PR	PR	m	66	4	adeno ca
30	241	213	TATGC	0	0	34	0	1	2	plasma	exon_19_del	N	gefitinib PR	PR	m	66	4	adeno ca
30	263	213	ACTAC	43	0	69	2	2	5	plasma	exon_19_del	N	gefitinib PR	PR	m	66	4	adeno ca
30	273	213	CATAG	0	0	3	0	1	2	plasma	exon_19_del	N	gefitinib PR	PR	m	66	4	adeno ca
31	231	218	ACTAC	605	0	5	0	0	4	plasma	exon_19_del	N	gefitinib 2weeks after treatment	PR	f	35	4	adeno ca
31	245	218	ATAGC	2	0	4	1	3	6	plasma	exon_19_del	N	gefitinib 1month after treatment	PR	f	35	4	adeno ca
31	252	218	CACGT	351	0	16	0	2	6	plasma	exon_19_del	N	gefitinib 2months after treatment	PR	f	35	4	adeno ca
31	284	218	CACGT	16481	0	1111	1	2	4	plasma	exon_19_del	Y	gefitinib PD	PR	f	35	4	adeno ca
32	227	226	ACTAC	52892	0	8	5	3	1	plasma	exon_19_del	N	gefitinib before treatment	PR	f	71	4	adeno ca
32	235	226	ATAGC	277	0	6	0	0	7	plasma	exon_19_del	N	gefitinib 1week after treatment	PR	f	71	4	adeno ca
32	237	226	TATGC	58	0	11	1	0	2	plasma	exon_19_del	N	gefitinib 2week after treatment	PR	f	71	4	adeno ca
32	240	226	CACGT	1	0	4	2	1	2	plasma	exon_19_del	N	gefitinib 3week after treatment	PR	f	71	4	adeno ca
32	249	226	AGCAT	113	0	7	0	1	0	plasma	exon_19_del	N	gefitinib 1month after treatment	PR	f	71	4	adeno ca
32	257	226	TATGC	128	0	26	2	0	2	plasma	exon_19_del	N	gefitinib PR	PR	f	71	4	adeno ca
32	281	226	ACGTA	82	0	31	0	1	0	plasma	exon_19_del	N	gefitinib PR	PR	f	71	4	adeno ca
32	291	226	CATAG	0	0	1	0	1	1	plasma	exon_19_del	N	gefitinib PR	PR	f	71	4	adeno ca
32	298	226	ACGTA	135	0	275	2	1	1	plasma	exon_19_del	Y	gefitinib PD	PR	f	71	4	adeno ca
32	313	226	CACGT	5118	0	490	4	3	5	plasma	exon_19_del	Y	gefitinib PD beyond PD treatment	PR	f	71	4	adeno ca
33	259	259	CATAG	208	0	7	1	3	3	plasma	exon_19_del	N	gefitinib before treatment	SD	f	61	4	adeno ca
33	271	259	TGACT	0	0	3	1	0	3	plasma	exon_19_del	N	gefitinib 2week after treatment	SD	f	61	4	adeno ca
33	295	259	AGCAT	0	0	5	1	1	1	plasma	exon_19_del	Y	gefitinib PD	SD	f	61	4	adeno ca
33	303	259	TATGC	617	0	17	3	0	9	plasma	exon_19_del	Y	gefitinib PD beyond PD treatment	SD	f	61	4	adeno ca
33	311	259	ACGTA	0	0	4	2	4	4	plasma	exon_19_del	Y	gefitinib PD beyond PD treatment	SD	f	61	4	adeno ca
34	269	269	CACGT	607	0	6	2	3	3	plasma	exon_19_del	N	gefitinib 2week after treatment	SD	f	74	4	adeno ca
34	278	269	AGCAT	175	0	17	2	1	7	plasma	exon_19_del	N	gefitinb 1month after treatment	SD	f	74	4	adeno ca
34	294	269	ACTAC	230	0	34	2	1	1	plasma	exon_19_del	N	gefitinib 3week after treatment	SD	f	74	4	adeno ca
34	302	269	CACGT	463	0	37	1	2	3	plasma	exon_19_del	N	gefitinib 5 months after trreatment	SD	f	74	4	adeno ca
34	310	269	ACAGT	4152	0	4	2	3	4	plasma	exon_19_del	N	gefitinib 5 months after trreatment	SD	f	74	4	adeno ca
34	314	269	TATGC	1213	0	3	5	40	1	plasma	exon_19_del	N	geftinib 7 months after treatment	SD	f	74	4	adeno ca
35	292	292	CGATA	0	0	1	0	2	2	plasma	exon_19_del	NE	after surgery	NE	f	64	4	adeno ca
36	48	24	AGCAT	0	20931	7	1	3	8	BAL	L858R	Y	erlotinib PD	PR	m	66	4	adeno ca
36	51	24	CATAG	0	21238	7	1	3	10	plasma	L858R	Y	erlotinib PD	PR	m	66	4	adeno ca
37	96	41	ATAGC	0	5000	254	4	2	10	plasma	L858R	Y	gefitinib PD, erlotinib PD	PR	f	75	4	adeno ca
37	110	41	ACAGT	0	0	24	7	4	1	plasma	L858R	Y	erlotinib+Pemetrexed PR	PR	f	75	4	adeno ca
37	142	41	ACGTA	0	20603	3008	17	3	22	CSF	L858R	Y	erlotinib+Pemetrexed PR	PR	f	75	4	adeno ca
37	143	41	ATGCT	0	0	6	3	3	2	plasma	L858R	Y	erlotinib+Pemetrexed PR	PR	f	75	4	adeno ca
37	200	41	ATGCT	16	38439	6907	17	10	19	CSF	L858R	Y	erlotinib+Pemetrexed PD	PR	f	75	4	adeno ca
37	201	41	CACGT	185	185	11	1	2	3	plasma	L858R	Y	erlotinib+Pemetrexed PD	PR	f	75	4	adeno ca
38	176	52	ATAGC	1	0	11	0	3	102	plasma	L858R	N	gefitinib PR	PR	m	69	4	adeno ca
38	198	52	AGCAT	251	854	441	1	1	1	plasma	L858R	Y	gefitnib PD	PD	m	69	4	adeno ca
39	58	58	AGCAT	0	1	36	1	1	14	plasma	L858R	Y	erlotinib rechallenge PR	PR	f	63	4	adeno ca
40	159	61	AGCAT	0	32	6	0	3	0	plasma	L858R	N	erlotininb PR	PR	f	74	4	adeno ca
40	203	61	ATAGC	0	0	118	0	4	40	plasma	L858R	ND	erlotininb PR	PR	f	74	4	adeno ca
40	250	61	ATAGC	1	68	2	2	4	11	plasma	L858R	N	erlotininb PR	PR	f	74	4	adeno ca
40	282	61	ATAGC	0	759	91	3	2	39	plasma	L858R	Y	erlotininb PD	PR	f	74	4	adeno ca
40	285	61	ACAGT	0	7	7	1	3	3	CSF	L858R	Y	erlotininb PD (meningitis susupected but denied)	PR	f	74	4	adeno ca
41	156	66	ACTAC	0	34	7	2	0	1	plasma	L858R	N	gefitinib PR 4month after start	PR	f	46	4	adeno ca
41	184	66	ACTAC	20	0	10	4	2	121	plasma	L858R	N	gefitinib PR 6month after start	PR	f	46	4	adeno ca
41	211	66	ATAGC	0	0	58	2	3	7	plasma	L858R	N	gefitinib PR 8month after start	PR	f	46	4	adeno ca
41	261	66	AGCAT	110	143	19	2	2	2	plasma	L858R	Y	gefitiib PD	PR	f	46	4	adeno ca
42	256	92	CACGT	0	1223	22	3	0	4	plasma	L858R	Y	erlotnib PD	PR	f	86	4	adeno ca
43	188	99	TATGC	0	0	3	0	2	1	plasma	L858R	N	gefitinib PR	PR	f	70	4	adeno ca
43	254	99	TGACT	0	0	18	0	0	6	plasma	L858R	N	gefitinib PR	PR	f	70	4	adeno ca
43	308	99	AGCAT	85	0	6	3	7	2	plasma	L858R	N	gefitinib PR	PR	f	70	4	adeno ca
44	122	117	ATAGC	0	105	18	2	6	26	plasma	L858R	N	gefitinib treatment during PR	PR	f	82	4	adeno ca
44	131	117	AGCAT	0	0	164	0	0	3	plasma	L858R	N	gefitinib treatment during PR	PR	f	82	4	adeno ca
44	134	117	ACAGT	0	0	5	1	5	7	plasma	L858R	N	gefitinib treatment during PR	PR	f	82	4	adeno ca
44	158	117	ACGTA	0	0	192	0	2	1	plasma	L858R	N	gefitinib stop for AE	PR	f	82	4	adeno ca
45	189	126	TGACT	0	0	7	0	2	1	plasma	L858R	N	erlotinib PR	PR	f	58	4	adeno ca
45	266	126	ACAGT	50	0	37	1	1	48	plasma	L858R	Y	erlotinib PD	PD	f	58	4	adeno ca
46	187	130	CACGT	0	0	2	2	3	0	plasma	L858R	N	gefitinib PR	PR	f	75	4	adeno ca
46	280	130	ACAGT	0	0	3	0	1	0	plasma	L858R	N	gefitinib PR	PR	f	75	4	adeno ca
46	307	130	CTATG	0	0	7	0	0	2	plasma	L858R	N	gefitinib PR	PR	f	75	4	adeno ca
47	147	147	ATGCT	16	35012	9	10	13	9	plasma	L858R	N	before therapy	NE	f	40	3A	adeno ca
48	157	157	TATGC	191	0	8	5	7	4	plasma	L858R	Y	gefitinib PD	CR	f	66	4	adeno ca
49	161	161	TGACT	0	627	4	3	3	6	plasma	L858R	N	gefitinib PR	CR	f	63	4	adeno ca
49	174	161	ATGCT	1	0	5	2	1	10	plasma	L858R	N	gefitinib PR	CR	m	63	4	adeno ca
50	268	178	ATGCT	0	258	9	0	1	4	plasma	L858R	N	erlotinib PR	PR	f	78	4	adeno ca
50	283	178	ATGCT	0	0	233	1	1	0	plasma	L858R	Y	erlotinib PD beyond PD treatment	PR	f	78	4	adeno ca
50	296	178	ATAGC	1	128	11	0	3	9	plasma	L858R	Y	erlotinib PD beyond PD treatment	PR	f	78	4	adeno ca
50	306	178	CGATA	48	5562	2870	0	2	1	plasma	L858R	Y	erlotinib PD beyond PD treatment	PR	f	78	4	adeno ca
51	246	180	ACTAC	0	5410	10	15	5	4	plasma	L858R	Y	erlotinib PD	PR	m	64	4	adeno ca
52	191	191	CATAG	0	18938	129	2	3	20	plasma	L858R	N	gefitinib before treatment	PR	m	69	4	adeno ca
52	193	191	CTATG	61	826	4	2	1	3	plasma	L858R	N	gefitinib PR	PR	m	69	4	adeno ca
52	264	191	AGCAT	161	3051	2	0	4	5	plasma	L858R	N	gefitinib PR	PR	m	69	4	adeno ca
53	192	192	CGATA	0	13249	8	3	6	20	plasma	L858R	N	gefitinib before treatment	PR	f	74	4	adeno ca
53	244	192	AGCAT	3	0	135	1	0	2	plasma	L858R	N	gefitinib PR	PR	f	74	4	adeno ca
53	260	192	CGATA	40	123	14	3	3	0	plasma	L858R	N	gefitnib PR	PR	f	74	4	adeno ca
54	199	199	ACTAC	0	1131	11	9	2	7	plasma	L858R	N	gefitinib before treatment	PR	f	80	4	adeno ca
54	288	199	TGACT	0	0	3	1	2	3	plasma	L858R	N	gefitinib PR	PR	f	80	4	adeno ca
55	229	221	ATAGC	0	2497	10	1	4	9	plasma	L858R	N	gefitinib 1week after treatment	PR	m	61	4	adeno ca
56	243	243	ACTAC	3	495	3	2	3	3	plasma	L858R	N	gefitinib before treatment	PR	m	63	4	adenosquamous ca.
56	251	243	ATAGC	0	0	41	1	1	19	plasma	L858R	N	gefitinib PR 2weeks after start	PR	m	63	4	adenosquamous ca.
56	253	243	TATGC	81	0	18	1	0	7	plasma	L858R	N	gefitinib PR 1month after start	PR	m	63	4	adenosquamous ca.
56	265	243	ATAGC	0	1	26	1	3	14	plasma	L858R	N	gefitinib PR 2month after start	PR	m	63	4	adenosquamous ca.
56	279	243	ATAGC	0	0	3	0	4	5	plasma	L858R	N	gefitinib PR 4month after start	PR	m	63	4	adenosquamous ca.
56	297	243	ACAGT	30	33	8	2	0	0	plasma	L858R	N	gefitinib PR 6month after start	PR	m	63	4	adenosquamous ca.
56	304	243	TGACT	0	0	5	2	2	7	plasma	L858R	N	gefitinib PR 8month after start	PR	m	63	4	adenosquamous ca.
56	312	243	ATGCT	0	67	8	9	1	4	plasma	L858R	N	gefitinib PR 10month after start	PR	m	63	4	adenosquamous ca.
57	275	274	CTATG	0	43	6	1	2	0	plasma	L858R	Y	gefitinib PD	CR	f	62	4	adeno ca
58	124	3	ACGTA	3	0	4	33926	2	2	CSF	L861Q	Y	erlotinib PD but erlotinib+gemcitabine SD for meningitis	CR	f	53	4	adeno ca
58	125	3	ATGCT	3	0	14	6	8	0	plasma	L861Q	Y	erlotinib PD but erlotinib+gemcitabine SD for meningitis	CR	f	53	4	adeno ca
58	177	3	ACAGT	0	0	6	2	3	3	plasma	L861Q	Y	erlotinib PD but erlotinib+gemcitabine SD for meningitis	CR	f	53	4	adeno ca
58	190	3	ACGTA	0	0	1	5	2	1	plasma	L861Q	Y	erlotinib PD but erlotinib+gemcitabine SD for meningitis	CR	f	53	4	adeno ca
58	287	3	TATGC	0	1	45	231	8	4	plasma	L861Q	Y	erlotinib+gemcitabine SD for meningitis	CR	f	53	4	adeno ca
58	289	3	TGACT	0	0	244	52493	2	5	CSF	L861Q	Y	erlotinib+gemcitabine SD for meningitis	CR	f	53	4	adeno ca
58	319	3	CGATA	0	0	6	3	5	6	plasma	L861Q	Y	erlotinib+gemcitabine SD stop for AE	CR	f	53	4	adeno ca
58	320	3	CTATG	0	0	11	29188	4	9	CSF	L861Q	Y	erlotinib+gemcitabine SD stop for AE	CR	f	53	4	adeno ca
59	209	209	ACTAC	2	0	6	1	0	0	plasma	G719A	N	gefitinib before treatment	PR	f	75	4	adeno ca
59	210	209	AGCAT	0	0	8	0	3	4	plasma	G719A	N	gefitinib 1week after treatment	PR	f	75	4	adeno ca
59	217	209	ACTAC	1	0	10	3	1	2	plasma	G719A	N	gefitinib 2week after treatment	PR	f	75	4	adeno ca
59	222	209	AGCAT	5	0	17	5	0	1	plasma	G719A	N	gefitinib 2week after treatment	PR	f	75	4	adeno ca
59	255	209	ACTAC	77	0	21	1	1	4	plasma	G719A	N	gefitinib 1month after treatment	PR	f	75	4	adeno ca
60	63	63	ATGCT	0	0	16	0	2	6	plasma	no_data	Y	gefitinib rechallenge PD	PR	f	63	4	adeno ca
61	135	135	ACGTA	0	0	4	1	0	7	plasma	no_data	Y	gefitinib PD,gefitinib+docetaxel SD	PD	m	56	4	adeno ca
