# Supplementary material for: Quantitative Identification of Mutant Alleles Derived from Lung Cancer in Plasma Cell-Free DNA via Anomaly Detection Using Deep Sequencing Data
Source: PLoS One. 2013 Nov 21;8(11):e81468. doi: 10.1371/journal.pone.0081468 (PMC3836767; doi:10.1371/journal.pone.0081468)
Supplement: Table S5 — List of primers with index and adaptor. (XLS) [file pone.0081468.s006.xls]

## Sheet: Sheet1
Table S5. List of primers with index and adaptor.
EGFR exon 19
name	forward/reverse	index	primer sequencea	amplified genomic regionb
e19ion03F3	forward	ACTAC	CCATCTCATCCCTGCGTGTCTCCGACTCAGACTACCCAGAAGGTGAGAAAGTTAAAA	chr7:55242427-55242531
e19ion05F3	forward	AGCAT	CCATCTCATCCCTGCGTGTCTCCGACTCAGAGCATCCAGAAGGTGAGAAAGTTAAAA
e19ion07F3	forward	ATAGC	CCATCTCATCCCTGCGTGTCTCCGACTCAGATAGCCCAGAAGGTGAGAAAGTTAAAA
e19ion09F3	forward	CACGT	CCATCTCATCCCTGCGTGTCTCCGACTCAGCACGTCCAGAAGGTGAGAAAGTTAAAA
e19ion20F3	forward	TATGC	CCATCTCATCCCTGCGTGTCTCCGACTCAGTATGCCCAGAAGGTGAGAAAGTTAAAA
e19ion24F3	forward	TGACT	CCATCTCATCCCTGCGTGTCTCCGACTCAGTGACTCCAGAAGGTGAGAAAGTTAAAA
e19ion01F3	forward	ACAGT	CCATCTCATCCCTGCGTGTCTCCGACTCAGACAGTCCAGAAGGTGAGAAAGTTAAAA
e19ion02F3	forward	ACGTA	CCATCTCATCCCTGCGTGTCTCCGACTCAGACGTACCAGAAGGTGAGAAAGTTAAAA
e19ion08F3	forward	ATGCT	CCATCTCATCCCTGCGTGTCTCCGACTCAGATGCTCCAGAAGGTGAGAAAGTTAAAA
e19ion11F3	forward	CATAG	CCATCTCATCCCTGCGTGTCTCCGACTCAGCATAGCCAGAAGGTGAGAAAGTTAAAA
e19ion12F3	forward	CGATA	CCATCTCATCCCTGCGTGTCTCCGACTCAGCGATACCAGAAGGTGAGAAAGTTAAAA
e19ion15F3	forward	CTATG	CCATCTCATCCCTGCGTGTCTCCGACTCAGCTATGCCAGAAGGTGAGAAAGTTAAAA
e19ion_trP1_3	reverse		CCTCTCTATGGGCAGTCGGTGATAGCAAAGCAGAAACTCACAT
EGFR exon 20
name	forward/reverse	index	primer sequencea	amplified genomic regionb
e20ion03F3	forward	ACTAC	CCATCTCATCCCTGCGTGTCTCCGACTCAGACTACCATCTGCCTCACCTCCA	chr7:55249039-55249123
e20ion05F3	forward	AGCAT	CCATCTCATCCCTGCGTGTCTCCGACTCAGAGCATCATCTGCCTCACCTCCA
e20ion07F3	forward	ATAGC	CCATCTCATCCCTGCGTGTCTCCGACTCAGATAGCCATCTGCCTCACCTCCA
e20ion09F3	forward	CACGT	CCATCTCATCCCTGCGTGTCTCCGACTCAGCACGTCATCTGCCTCACCTCCA
e20ion20F3	forward	TATGC	CCATCTCATCCCTGCGTGTCTCCGACTCAGTATGCCATCTGCCTCACCTCCA
e20ion24F3	forward	TGACT	CCATCTCATCCCTGCGTGTCTCCGACTCAGTGACTCATCTGCCTCACCTCCA
e20ion01F3	forward	ACAGT	CCATCTCATCCCTGCGTGTCTCCGACTCAGACAGTCATCTGCCTCACCTCCA
e20ion02F3	forward	ACGTA	CCATCTCATCCCTGCGTGTCTCCGACTCAGACGTACATCTGCCTCACCTCCA
e20ion08F3	forward	ATGCT	CCATCTCATCCCTGCGTGTCTCCGACTCAGATGCTCATCTGCCTCACCTCCA
e20ion11F3	forward	CATAG	CCATCTCATCCCTGCGTGTCTCCGACTCAGCATAGCATCTGCCTCACCTCCA
e20ion12F3	forward	CGATA	CCATCTCATCCCTGCGTGTCTCCGACTCAGCGATACATCTGCCTCACCTCCA
e20ion15F3	forward	CTATG	CCATCTCATCCCTGCGTGTCTCCGACTCAGCTATGCATCTGCCTCACCTCCA
e20ion_trP1_3	reverse		CCTCTCTATGGGCAGTCGGTGATGTCTTTGTGTTCCCGGACAT
EGFR exon 21
name	forward/reverse	index	primer sequencea	amplified genomic regionb
e21ion03F3	forward	ACTAC	CCATCTCATCCCTGCGTGTCTCCGACTCAGACTACGCAGCATGTCAAGATCACAG	chr7:55259486-55259583
e21ion05F3	forward	AGCAT	CCATCTCATCCCTGCGTGTCTCCGACTCAGAGCATGCAGCATGTCAAGATCACAG
e21ion07F3	forward	ATAGC	CCATCTCATCCCTGCGTGTCTCCGACTCAGATAGCGCAGCATGTCAAGATCACAG
e21ion09F3	forward	CACGT	CCATCTCATCCCTGCGTGTCTCCGACTCAGCACGTGCAGCATGTCAAGATCACAG
e21ion20F3	forward	TATGC	CCATCTCATCCCTGCGTGTCTCCGACTCAGTATGCGCAGCATGTCAAGATCACAG
e21ion24F3	forward	TGACT	CCATCTCATCCCTGCGTGTCTCCGACTCAGTGACTGCAGCATGTCAAGATCACAG
e21ion01F3	forward	ACAGT	CCATCTCATCCCTGCGTGTCTCCGACTCAGACAGTGCAGCATGTCAAGATCACAG
e21ion02F3	forward	ACGTA	CCATCTCATCCCTGCGTGTCTCCGACTCAGACGTAGCAGCATGTCAAGATCACAG
e21ion08F3	forward	ATGCT	CCATCTCATCCCTGCGTGTCTCCGACTCAGATGCTGCAGCATGTCAAGATCACAG
e21ion11F3	forward	CATAG	CCATCTCATCCCTGCGTGTCTCCGACTCAGCATAGGCAGCATGTCAAGATCACAG
e21ion12F3	forward	CGATA	CCATCTCATCCCTGCGTGTCTCCGACTCAGCGATAGCAGCATGTCAAGATCACAG
e21ion15F3	forward	CTATG	CCATCTCATCCCTGCGTGTCTCCGACTCAGCTATGGCAGCATGTCAAGATCACAG
e21ion_trP1_3	reverse		CCTCTCTATGGGCAGTCGGTGATAAAGCCACCTCCTTACTTTG
aAdaptors for Ion Torrent PGM system (forward: CCATCTCATCCCTGCGTGTCTCCGACTCAG, reverse: CCTCTCTATGGGCAGTCGGTGAT) and 5-nt index were added to region-specific primers.
bGenomic positions are based on the human genme (GRCh37/hg19).
